# Supplementary material for: Disordered breathing in a mouse model of Dravet syndrome
Source: eLife. 2019 Apr 26;8:e43387. doi: 10.7554/eLife.43387 (PMC6506208; doi:10.7554/eLife.43387)
Supplement: Figure 1—source data 1. [file elife-43387-fig1-data1.xlsx]

## Sheet: Figure 1F- Source Data 1
Figure 1F		Surivival Rate		wildtype survive >p35(DOB_No. of pup)
				het-mutant(DOB_No. of pup)
Postnatal Day																							weaning>>>
	0	1	2	3	4	5	6	7	8	9	10	11	12	13	14	15	16	17	18	19	20	21	22	23	24	25	26	27	28	29	30	31	32	33	34	35
										012217_1				082916_1	062616_1	082916_3	061516_3	051916_1	102516_3	071716_1	071716_2	080416-3	050216_10													050216_6
										012217_6				041817_7	062616_4	040417_6	061516_7	051916_4	102916_1	082216_7		102516_5														050216_9
														051117_5	062616_6		061516_10	051916_8	102916_4	101716_																051916_6
															120516_		061516_11	171716_4	102916_3																	051916_7
															082216_3		071716_8	102516_1	102916_6																	051916_10
															051157_3		091116_4	110516_8	062417_4																	051916_11
															080517_5VS			072617_4vst	072617_5vst																	061516_1
																																				061516_9
																																				080416-1
																																				080416-2
	RATIO							1	1	0.95122	0.95122	0.95122	0.95122	0.878049	0.707317	0.658537	0.512195	0.341463	0.170732	0.097561	0.0731707	0.0243902	0	0	0	0	0	0	0	0	0					071716_5
MUTANT	%							100	100	95.122	95.122	95.122	95.122	87.8049	70.7317	65.8537	51.2195	34.1463	17.0732	9.7561	7.31707	2.43902	0	0	0	0	0	0	0	0	0					071716_7
CTRL	%							100	100	100	100	100	100	100	100	100	100	100	100	100	100	100	100	100	100	100	100	100	100	100	100					082216_2
																																				082216_4
																																				082216_5
															MUTANT	WT																				082216_6
														TOTAL N=	41	57																				082916_2
																																				082916_4
																																				082916_5
																																				082916_6
																																				102516_2
																																				102516_4
																																				102916_2
																																				101716_1
																																				101716_2
																																				101716_3
																																				101716_6
																																				051117_1m
																																				051117_6m
																																				051117_7f
																																				051117_2f
																																				042917_8m
																																				042917_10f
																																				042917_2f
																																				042917_1f
																																				042917_4f
																																				042917_3f
																																				042917_9f
																																				060517_1Tm
																																				060517_7f
																																				061417_2Tm
																																				061017_2_Sf
																																				060917_1_vt
																																				060917_6_t
																																				060917_3_st
																																				060917_4_vt
																																				060917_5_st
																																				031917_4t
																																				031917_5s
																																				060517_6v
																																				060517_2s
																																				070417_8vt
																																				070417_5na
																																				070417_3na
																																				070417_2vt
																																				070417_8na
																																				070417_7na
