# Supplementary material for: Disordered breathing in a mouse model of Dravet syndrome
Source: eLife. 2019 Apr 26;8:e43387. doi: 10.7554/eLife.43387 (PMC6506208; doi:10.7554/eLife.43387)
Supplement: Figure 2—source data 1. [file elife-43387-fig2-data1.xlsx]

## Sheet: Figure 2C- Source Data 2
			PSD area										PSD Max
	Theta		Alpha		Beta					Theta		Alpha		Beta
	WT	Mutant	WT	Mutant	WT	Mutant				WT	Mutant	WT	Mutant	WT	Mutant
Average	0.102055	0.125937	0.124086	0.192974	0.0894697	0.158391			Average	0.12911	0.209637	0.0689993	0.143873	0.0380371	0.109804
N	61	151	61	151	61	151			N	66	151	66	151	66	151
SD	0.181217	0.100587	0.215893	0.175064	0.18344	0.201711			SD	0.197945	0.216387	0.140894	0.178073	0.0911331	0.197392
SE	0.0232025	0.00818562	0.0276423	0.0142465	0.0234871	0.016415			SE	0.0243654	0.0176093	0.0173428	0.0144914	0.0112177	0.0160635
	0.060858	0.208322	0.0407	0.399553	0.040693	1				0.170088	0.405199	0.04887	0.225832	0.040858	0.773703
	0.023099	0.655919	0.006836	1	0.001182	0.890052				0.198326	1	0.156585	0.708316	0.106675	0.266205
	0.02989	0.154097	0.036342	0.349826	0.034846	1				0.728776	0.689935	0.212276	0.455199	0.159099	0.72469
	0.037843	0.142369	0.05187	0.270095	0.060489	0.132264				0.333494	0.354106	0.202872	0.291984	0.13719	0.053302
	0.013049	0.148691	0.004397	0.256061	0.000949	0.118978				0.483023	0.240087	0.28762	0.134945	0.159951	0.057008
	0.010855	0.255407	0.005175	0.438447	0.0012	0.156554				0.06957	0.255407	0.026292	0.438447	0.030965	0.156554
	0.029182	0.24643	0.038356	0.503037	0.026519	0.200145				0.696968	0.544414	0.135192	0.561192	0.096625	0.182802
	0.042931	0.031417	0.03532	0.036461	0.015636	0.013329				0.043585	0.0317023	0.020986	0.0138282	0.007554	0.00312194
	0.126428	0.073042	0.153497	0.058763	0.180566	0.023509				0.050176	0.097142	0.00206	0.0361382	0.000308	0.00960987
	0.06845	0.056687	0.097864	0.037043	0.084877	0.009689				0.064288	0.0764036	0.010635	0.0283454	0.011036	0.0039916
	0.067037	0.074577	0.097519	0.027555	0.078916	0.009947				0.016565	0.0708305	0.003596	0.0258062	0.000222	0.00247167
	0.064109	0.031642	0.178503	0.044838	0.213172	0.020559				0.011394	0.0420851	0.007834	0.0152343	0.004811	0.00766982
	0.098242	0.062295	0.11648	0.117916	0.141892	0.023334				0.028489	0.0461594	0.009754	0.0359528	0.009491	0.00792062
	0.045247	0.091972	0.024375	0.093019	0.017215	0.034604				0.031702	0.0478388	0.013828	0.0217088	0.003122	0.010523
	0.01477	0.044776	0.008078	0.046139	0.005847	0.012119				0.076404	0.0801819	0.028345	0.040724	0.003992	0.0101019
	0.020853	0.127582	0.020049	0.110235	0.012202	0.015493				0.070831	0.0813659	0.025806	0.0233333	0.002472	0.00458957
	0.033976	0.144352	0.025202	0.143193	0.014723	0.077275				0.042085	0.50356	0.015234	0.142606	0.00767	0.0131803
	0.030006	0.050772	0.027003	0.093047	0.029424	0.016235				0.046159	0.316633	0.035953	0.162637	0.007921	0.0422559
	0.022516	0.053586	0.014715	0.062951	0.008765	0.030695				0.047839	0.052987	0.021709	0.0401576	0.010523	0.00472112
	0.011848	0.062	0.014435	0.070734	0.005808	0.023513				0.080182	0.0657365	0.040724	0.0192128	0.010102	0.00792772
	0.068001	0.065321	0.105228	0.118425	0.083547	0.018916				0.081366	0.043206	0.023333	0.0279249	0.00459	0.00540388
	0.988386	0.055656	1	0.098778	0.805052	0.023217				0.50356	0.0876429	0.142606	0.056715	0.01318	0.00616358
	0.371668	0.04052	0.898655	0.018493	1	0.005413				0.316633	0.0587643	0.162637	0.0524029	0.042256	0.00936738
	0.444605	0.053145	0.497655	0.038114	0.483077	0.008287				0.052987	0.0509318	0.040158	0.0117232	0.004721	0.00194015
	0.07693	0.07983	0.529949	0.10988	0.314807	0.021264				0.065737	0.0668696	0.019213	0.0228218	0.007928	0.00232458
	0.037725	0.077228	0.055129	0.056378	0.020622	0.018226				0.043206	0.134044	0.027925	0.0461808	0.005404	0.00978834
	0.04343	0.051535	0.038359	0.043781	0.013855	0.029627				0.087643	0.144359	0.056715	0.0458559	0.006164	0.00632556
	0.029638	0.373759	0.013975	0.429726	0.002372	0.209601				0.058764	0.069034	0.052403	0.020746	0.009367	0.005199
	0.051961	0.120348	0.025364	0.21712	0.005108	0.216401				0.050932	0.638467	0.011723	0.205023	0.00194	0.112028
	0.22533	0.098964	0.292248	0.153498	0.194037	0.079579				0.06687	0.229526	0.022822	0.088256	0.002325	0.12107
	0.085673	0.055294	0.115579	0.111061	0.122215	0.149619				0.134044	0.121243	0.046181	0.082361	0.009788	0.02858
	0.047374	0.201351	0.091842	0.380112	0.046416	0.391863				0.144359	0.074853	0.045856	0.041613	0.006326	0.050851
	0.042772	0.459546	0.099037	1	0.046868	0.2978				0.0378377	0.201351	0.0162106	0.380112	0.00419033	0.391863
	0.037701	0.386369	0.019714	0.471536	0.005239	0.201803				0.0295691	1	0.0148999	0.466595	0.00196697	0.153022
	0.031417	0.103893	0.036461	0.136006	0.013329	0.151156				0.053314	0.436614	0.00648438	0.188989	0.000996478	0.078133
	0.056687	0.407562	0.037043	0.786447	0.009689	0.395292				0.0356259	0.108354	0.00796222	0.062477	0.00133932	0.041642
	0.074577	0.390657	0.027555	0.337102	0.009947	0.212224				0.154924	0.49563	0.0675406	0.369056	0.035131	0.166012
	0.031642	0.259824	0.044838	0.288655	0.020559	0.175683				0.0797882	0.758849	0.0406321	0.353661	0.0260634	0.148638
	0.062294	0.317037	0.117916	0.4576	0.023334	0.252779				0.0612564	0.344858	0.0359544	0.192117	0.0108265	0.073917
	0.043112	0.111051	0.059735	0.135145	0.043253	0.121997				0.0216555	0.598661	0.0192584	0.236813	0.00371901	0.122495
	0.091972	0.0975	0.093019	0.161039	0.034604	0.215914				0.0240231	0.115124	0.00510076	0.059936	0.00102256	0.053334
	0.044776	0.267435	0.046139	0.351617	0.012119	0.228331				0.064288	0.101593	0.010635	0.074618	0.011036	0.092022
	0.127582	0.049172	0.110235	0.053635	0.015493	0.064405				0.016565	0.460695	0.003596	0.367053	0.000222	0.128353
	0.144352	0.12525	0.143193	0.259449	0.077275	0.145737				0.011394	0.034416	0.007834	0.01833	0.004811	0.021264
	0.050772	0.049542	0.093047	0.076332	0.016235	0.076989				0.028489	0.21249	0.009754	0.145355	0.009491	0.083957
	0.053586	0.104094	0.062951	0.206409	0.030695	0.152178				0.034901	0.052268	0.002902	0.030031	0.000546	0.028835
	0.062	0.106792	0.070734	0.414038	0.023513	0.170734				0.017962	0.131916	0.00235	0.125523	0.000356	0.058744
	0.065321	0.109657	0.118425	0.142003	0.018916	0.080261				0.036643	0.349435	0.024594	0.42452	0.007798	0.176872
	0.055656	0.108158	0.098778	0.25455	0.023217	0.162624				0.036927	0.184083	0.011871	0.104981	0.003614	0.04854
	0.04052	0.07504	0.018493	0.149786	0.005413	0.139654				0.216543	0.170959	0.084991	0.098365	0.119536	0.050811
	0.053145	0.153086	0.038114	0.200719	0.008287	0.17869				0.089672	0.110976	0.036504	0.07484	0.024138	0.052309
	0.07983	0.297754	0.10988	0.416939	0.021264	0.196456				0.120629	0.312981	0.064197	0.149947	0.047185	0.105078
	0.077228	0.191227	0.056378	0.307431	0.018226	0.15837				0.069325	0.644684	0.058524	0.425385	0.072599	0.088827
	0.048458	0.14213	0.010063	0.263694	0.002335	0.151003				0.079326	0.280781	0.038278	0.187553	0.058455	0.055686
	0.060858	0.13095	0.0407	0.172079	0.040693	0.139712				0.072779	0.257044	0.020828	0.154292	0.006915	0.079355
	0.023099	0.076664	0.006836	0.127008	0.001182	0.073632				0.017938	0.211237	0.003759	0.072671	0.003399	0.04735
	0.02989	0.297138	0.036342	0.488333	0.034846	0.299699				0.026364	0.055592	0.005388	0.045802	0.002713	0.020022
	0.037843	0.210594	0.05187	0.397166	0.060489	0.355266				0.035388	0.81359	0.0095	0.318231	0.004301	0.146584
	0.077984	0.070845	0.100638	0.091561	0.111008	0.073107				0.012865	0.464594	0.004921	0.118408	0.013319	0.19277
	0.33082	0.129668	0.160442	0.130122	0.121991	0.047514				0.013219	0.030537	0.003431	0.018411	0.001967	0.007558
	0.967525	0.068507	1	0.20588	0.541602	0.217779				0.009288	0.098508	0.005566	0.054098	0.00107	0.011309
		0.125584		0.133408		0.069551				0.062315	0.118326	0.067847	0.103768	0.032454	0.119926
		0.126878		0.126878		0.138495				0.107857	0.193955	0.039025	0.081845	0.021575	0.027494
		0.14776		0.247468		0.135767				0.868874	0.253141	0.79022	0.099826	0.642973	0.044064
		0.206496		0.28992		0.156611				0.900027	0.332207	0.745075	0.153471	0.281787	0.067252
		0.335855		0.290446		0.168175				0.17764	0.207204	0.330576	0.093239	0.128358	0.037004
		0.060858		0.0407		0.040693					1		0.209747		0.077488
		0.037843		0.05187		0.060489					0.064288		0.010635		0.011036
		0.013049		0.004397		0.000949					0.028489		0.009754		0.009491
		0.010855		0.005175		0.0012					0.034901		0.002902		0.000546
		0.029182		0.038356		0.026519					0.017962		0.00235		0.000356
		0.042931		0.03532		0.015636					0.036643		0.024594		0.007798
		0.126428		0.153497		0.180566					0.036927		0.011871		0.003614
		0.06845		0.097864		0.084877					0.216543		0.084991		0.119536
		0.067037		0.097519		0.078916					0.089672		0.036504		0.024138
		0.064109		0.178503		0.213172					0.120629		0.064197		0.047185
		0.098242		0.11648		0.141892
		0.01477		0.008078		0.005847					0.079326		0.038278		0.058455
		0.011848		0.014435		0.005808					0.017938		0.003759		0.003399
		0.068001		0.105228		0.083547					0.009288		0.005566		0.00107
		0.073185		0.074045		0.05961					0.062315		0.067847		0.032454
		0.096107		0.192911		0.101484					0.107857		0.039025		0.021575
		0.151865		0.138425		0.064079					0.207782		0.133251		0.070537
		0.100883		0.188918		0.061198					0.215325		0.190197		0.075478
		0.089399		0.170665		0.071859					0.14061		0.132426		0.035224
		0.05907		0.140284		0.073682					0.20357		0.19935		0.060011
		0.20181		0.299944		0.139579					0.058973		0.059475		0.036861
		0.079196		0.20533		0.646381					0.278866		0.120645		0.088901
		0.196093		0.16677		0.049895					0.139705		0.139232		0.681129
		0.193146		0.148068		0.066738					0.511506		0.104065		0.030913
		0.110706		0.572841		0.748766					0.37109		0.090256		0.035273
		0.28009		0.208315		0.132066					0.166685		0.86475		1
		0.102724		0.177712		0.897841					1		0.225201		0.115413
		0.036953		0.043411		0.020893					0.156098		0.09073		1
		0.059385		0.094104		0.051101					0.035363		0.025724		0.010681
		0.045819		0.10563		0.078172					0.066345		0.056147		0.023056
		0.142821		0.182966		0.301949					0.067193		0.117027		0.086951
		0.117167		0.421515		0.454015					0.208236		0.169945		0.283482
		0.094013		0.307858		0.221715					0.156851		0.395101		0.778767
		0.24898		0.367178		0.299022					0.189029		0.659732		0.169964
		0.18846		0.564798		0.664994					0.370585		0.699289		0.259403
		0.124764		0.434234		0.392307					0.229638		0.369985		0.7098
		0.081297		0.710272		1					0.206123		0.234749		0.436964
		0.139961		0.469237		0.401004					0.16521		1		0.934853
		0.177699		0.210057		0.10949					0.139692		0.679973		0.547226
		0.498868		0.497595		0.242055					0.254003		0.137912		0.041289
		0.154847		0.363412		0.517461					1		0.639304		0.201028
		0.123478		0.263964		0.183376					0.228318		0.228725		0.385729
		0.123891		0.145988		0.577987					0.167574		0.133154		0.120728
		0.107065		0.175809		0.183773					0.224169		0.219473		0.601134
		0.082401		0.270142		0.169476					0.101107		0.0863		0.10245
		0.189723		0.42694		0.163225					0.134167		0.21814		0.189207
		0.226706		0.12812		0.071355					0.340135		0.40299		0.107687
		0.048897		0.050556		0.021322					0.372464		0.100712		0.03379
		0.183686		0.119989		0.033157					0.081682		0.024973		0.010336
		0.045366		0.029907		0.011461					0.223301		0.05014		0.008845
		0.059124		0.058972		0.029764					0.029578		0.005913		0.001659
		0.038775		0.044304		0.021466					0.135706		0.039955		0.019483
		0.070237		0.054095		0.031204					0.065586		0.027275		0.008017
		0.127439		0.147794		0.088281					0.131597		0.031841		0.013235
		0.0893		0.092041		0.040208					0.20545		0.106068		0.054478
		0.249094		0.215523		0.260275					0.112573		0.040117		0.017176
		0.066838		0.074277		0.042172					0.555289		0.148685		0.165946
		0.180083		0.146433		0.090293					0.059327		0.029235		0.010648
		0.051333		0.084689		0.044228					0.198548		0.112334		0.036838
		0.130635		0.243795		0.10315					0.059265		0.035752		0.009996
		0.069921		0.05626		0.024837					0.304002		0.159638		0.09542
		0.07873		0.127808		0.06689					0.0663		0.023793		0.007357
		0.107074		0.169056		0.107015					0.102537		0.067107		0.031664
		0.029819		0.033184		0.010837					0.146569		0.085575		0.056514
		0.087578		0.06203		0.044241					0.047405		0.018723		0.006313
		0.074432		0.104186		0.070512					0.113867		0.054609		0.013708
		0.064046		0.142936		0.091215					0.079765		0.050111		0.021558
		0.084819		0.127528		0.118983					0.071837		0.050162		0.020261
		0.117318		0.154006		0.113571					0.065569		0.042581		0.036861
		0.073538		0.109644		0.068837					0.184989		0.133025		0.052881
		0.07206		0.081053		0.054525					0.118738		0.060079		0.036917
		0.064262		0.060855		0.044167					0.122428		0.050759		0.017242
		0.076873		0.063817		0.041567					0.049839		0.017265		0.00783
		0.188005		0.12524		0.094433					0.099703		0.059205		0.014392
		0.092286		0.118761		0.140545					0.27606		0.085979		0.031496
		0.069747		0.05979		0.036029					0.130287		0.059223		0.050368
		0.08032		0.087303		0.103663					0.094976		0.022212		0.012195
		0.054333		0.10596		0.080455					0.112417		0.06107		0.029464
		0.149461		0.148133		0.52479					0.10916		0.090626		0.043953
		0.0729		0.096702		0.064567					0.162713		0.115446		0.138789
		0.03465		0.064551		0.049111					0.056204		0.030835		0.014629
		0.115748		0.191757		0.11642					0.072951		0.034822		0.016479
		0.060574		0.078531		0.050591					0.088152		0.110272		0.030119
		0.093192		0.070204		0.033188					0.057934		0.029195		0.023932
		0.02318		0.017874		0.006683					0.151192		0.045475		0.017232
											0.019153		0.005273		0.001734
