# Supplementary material for: Disordered breathing in a mouse model of Dravet syndrome
Source: eLife. 2019 Apr 26;8:e43387. doi: 10.7554/eLife.43387 (PMC6506208; doi:10.7554/eLife.43387)
Supplement: Figure 3—source data 1. [file elife-43387-fig3-data1.xlsx]

## Sheet: Figure 3- Source Data 3
WT V.S. MUTANT Hypercapernia response
RPM														0	3	5	7	% CO2
			control WT						Scn1a mutant				WT	257.086	331.248	356.839	363.134
	0	3	5	7	% CO2		0	3	5	7	% CO2			13.6829	18.0095	11.9741	7.76675
	181.422	243.747	286.795	317.845			263.958	391.32	401.05	401.05			MUTANT	251.576	289.053	300.506	300.506
	190.17	238.941	359.333	397.75			127.427	230.335	272.44	272.44				18.9865	19.5444	14.3767	14.3767
	169.158	211.305	383.9	385.163			249.823	339.538	311.322	311.322
	266.685	396.31	335.175	343.25			120.23	175.575	250.77	250.77				F (1, 37) = 5.69	P=0.0223
	306.674	418.765	385.475	370.574			169.485	220.955	252.87	252.87
	199.54	220.04	441.925	324.595			450.55	401.65	305.97	305.97
	207.21	402.54	382.4	404.025			336.58	196.674	240.78	240.78
	307.135	290.48	309.755	297.04			229.815	193.91	230.985	230.985
	377.42	443.57	357.445	391.545			227.525	250.895	278.67	278.67
	225.445	278.455	425.9	352.535			296.332	222.47	238.805	238.805
	219.45	254.105	294.84	372.21			180.42	231.515	341.33	341.33
	368.25	312.77	376.005	353.97			217.5	427.225	412.92	412.92
	319.295	382.225	356.865	301.655			392.735	389.06	420.795	420.795
	293.775	455.305	421.74	431.46			228.98	255.81	262.515	262.515
	200.865	235.565	283.255	393.89			268.485	225.8	260.845	260.845
	301.245	328.24	367.39	413.36			191.432	367.225	357.2	357.2
	224.195	450.215	432.28	387.579			407.5	420	349.365	349.365
	291.57	268.885	304.175	375.06			221.495	318.64	298.11	298.11
	291.725	336.455	298.255	366.395			336.175	397.82	358.425	358.425
	195.575	466.85	448.39	348.465			258.839	206.21	351.42	351.42
	333.23	364.575	342.265	334.28			136.17	141.755	151.185	151.185
	185.86	288.105	256.905	326.295			223.22	354.785	263.365	263.365
Average	257.086	331.248	356.839	363.134		Average	251.576	289.053	300.506	300.506
N	22	22	22	22		N	22	22	22	22
SD	64.1787	84.4719	56.1633	36.4293		SD	89.0546	91.6714	67.4326	67.4326
SE	13.6829	18.0095	11.9741	7.76675		SE	18.9865	19.5444	14.3767	14.3767
TV														0	3	5	7	% CO2
			control WT						Scn1a mutant				WT	0.0202492	0.0268808	0.0323223	0.0355562
	0	3	5	7	% CO2		0	3	5	7	% CO2			0.00274416	0.00346454	0.00364782	0.00385964
	0.01163	0.027206	0.031723	0.031965			0.025439	0.024583	0.030417	0.0365			MUTANT	0.0154998	0.021845	0.028333	0.0306064
	0.025146	0.036319	0.039275	0.043129			0.025444	0.028917	0.04625	0.057				0.00204438	0.00257548	0.00298424	0.00313223
	0.034196	0.037054	0.046429	0.046518			0.023448	0.035069	0.045679	0.047986
	0.030913	0.030443	0.044494	0.048568			0.02635	0.026536	0.028366	0.031046				F (3, 111) = 0.671	P=0.5716
	0.010772	0.016452	0.01463	0.024437			0.01594	0.01921	0.02282	0.018937
	0.015592	0.015115	0.019347	0.022007			0.010652	0.016304	0.02442	0.022971
	0.012452	0.020244	0.01939	0.023042			0.018976	0.025052	0.031273	0.035643
	0.034932	0.037976	0.044825	0.047869			0.001	0.039474	0.037119	0.045222
	0.025506	0.034104	0.043569	0.047327			0.005	0.016588	0.015529	0.016235
	0	0.010209	0.028698	0.031672			0.008894	0.013529	0.013957	0.019786
	0.055512	0.08315	0.086378	0.096457			0.001	0.008092	0.019542	0.018702
	0.030618	0.035042	0.036587	0.04389			0.014983	0.017372	0.020876	0.026788
	0.015034	0.030856	0.039809	0.040259			0.017197	0.019773	0.025379	0.029924
	0.008553	0.013088	0.015385	0.016992			0.031429	0.035639	0.036992	0.043383
	0.026408	0.037031	0.047359	0.043779			0.023642	0.027572	0.030925	0.039538
	0.031299	0.035837	0.037872	0.042254			0.023688	0.026554	0.0375	0.012878
	0.010385	0.01101	0.011683	0.012356			0.029156	0.050126	0.06801	0.065554
	0.008539	0.016854	0.020225	0.022022			0.004529	0.016914	0.0227	0.024184
	0.013313	0.017563	0.021875	0.027063			0.011129	0.022339	0.032661	0.033952
	0.013903	0.010901	0.018734	0.020039			0.012853	7.61e-05	0.015982	0.020244
	0.005341	0.010341	0.012386	0.014091			0.006479	0	0.000986	0.008099
	0.025439	0.024583	0.030417	0.0365			0.003768	0.01087	0.015942	0.018768
Average						Average	0.0154998	0.021845	0.028333	0.0306064
N						N	22	22	22	22
SD						SD	0.00958899	0.0120801	0.0139973	0.0146915
SE						SE	0.00204438	0.00257548	0.00298424	0.00313223
MV														0	3	5	7	% CO2
			control WT						Scn1a mutant				WT	5.49898	9.22303	11.7122	12.8325
	0	3	5	7	% CO2		0	3	5	7	% CO2			1.05077	1.32209	1.47739	1.47684
	2.10994	6.63132	9.098	10.1598			6.71472	9.61995	12.1986	14.0321			MUTANT	3.54905	5.88683	8.0343	8.89188
	1.96439	3.10454	5.94386	7.51791			3.2423	6.66052	12.6004	15.7531				0.514646	0.690798	0.783335	0.937299
	4.25368	7.67448	15.0776	16.6116			5.85779	11.9074	14.2209	18.662
	9.11968	14.6847	15.5617	15.9672			3.16808	4.65905	7.11334	7.23381				F (3, 111) = 3.167	P=0.0273
	9.48012	12.7485	17.1512	17.9979			2.7016	4.2445	5.77053	7.34731
	2.14939	3.62017	6.46546	7.93222			4.79934	6.54864	7.47188	10.3896
	3.23086	6.08434	7.39831	8.89148			6.38704	4.92707	7.53001	9.76759
	2.00403	6.02003	7.16043	7.42			0	7.65434	8.57396	12.4292
	10.7287	11.0312	13.8848	14.219			1.13763	4.1619	4.32758	4.84956
	9.62639	15.1275	15.5737	18.5305			2.63554	3.00989	3.33305	5.13103
	1.36331	2.71062	4.33438	4.39369			0	1.87333	6.67027	4.51445
	0	2.59416	8.46124	11.7886			3.25874	7.42187	8.62008	9.56102
	20.4422	26.0067	32.4785	34.1428			6.75385	7.69278	10.6793	11.6444
	9.77617	13.394	13.0566	13.2398			7.19651	9.11684	9.71108	11.0337
	4.41655	14.0488	16.7889	17.3701			6.34742	6.22581	8.06659	11.1656
	1.71808	3.08317	4.35777	6.69296			4.53471	9.75131	13.395	3.50575
	7.95541	12.1549	17.3993	18.0966			1.00318	5.38946	6.76718	6.39751
	7.01705	16.1345	16.3712	16.3766			3.7413	8.88678	11.7066	9.72578
	3.02784	2.96032	3.55358	4.63415			3.32687	0.015693	5.6163	5.60533
	2.49113	5.67059	6.03212	8.06892			0.882228	0	0.149056	1.06075
	2.60359	8.19905	9.80853	9.43033			0.841119	3.85636	4.19857	6.91999
Average	5.49898	9.22303	11.7122	12.8325		Average	3.54905	5.88683	8.0343	8.89188
N	21	21	21	21		N	21	21	21	21
SD	4.81525	6.05857	6.77027	6.76771		SD	2.35841	3.16564	3.58969	4.29524
SE	1.05077	1.32209	1.47739	1.47684		SE	0.514646	0.690798	0.783335	0.937299
