# Supplementary material for: Disordered breathing in a mouse model of Dravet syndrome
Source: eLife. 2019 Apr 26;8:e43387. doi: 10.7554/eLife.43387 (PMC6506208; doi:10.7554/eLife.43387)
Supplement: Figure 4—source data 1. [file elife-43387-fig4-data1.xlsx]

## Sheet: Figure 4- Source Data 1
IF CURVE
	Current step		0	20	40	60	80	100	120	140	160	180	200	220	240	260	280	300
	Average	WT	0	0	1.69231	6.53846	14.9231	24.8462	34.5385	41.3077	47.7692	52.1538	54.8462	57.9231	61.6923	59.8462	55.4615	53.7692
		MUTANT	0	0.15	2.35	9.05	15.7	22.7	27.65	31.6	33.55	34.3	32.75	32.4	29.25	26.05	20.9	10.45
	SE	WT	0	0	1.16786	2.41951	3.50176	4.01096	4.7429	4.98894	5.49143	5.94186	6.13089	6.66358	7.63711	8.64829	10.9079	11.7245
		MUTANT	0	0.15	1.15684	2.33111	2.9559	3.452	3.80946	4.00224	4.34286	4.7893	5.35079	5.28523	5.52834	5.65056	5.51787	4.60862
WT																					AVERAGE	N	SD	SE
0	0	0	0	0	0	0	0	0	0	0	0	0	0								0	13	0	0		0	0
20	0	0	0	0	0	0	0	0	0	0	0	0	0								0	13	0	0		0	0
40	9	0	0	0	0	0	0	13	0	0	0	0	0								1.69231	13	4.21079	1.16786		1.69231	1.16786
60	24	0	4	8	0	0	4	24	11	0	0	0	10								6.53846	13	8.72368	2.41951		6.53846	2.41951
80	40	3	17	24	5	0	11	32	26	2	12	4	18								14.9231	13	12.6258	3.50176		14.9231	3.50176
100	54	14	28	35	13	5	18	41	37	10	29	11	28								24.8462	13	14.4617	4.01096		24.8462	4.01096
120	67	39	36	43	17	11	23	49	47	14	52	18	33								34.5385	13	17.1008	4.7429		34.5385	4.7429
140	75	57	44	51	21	18	27	59	53	20	49	25	38								41.3077	13	17.9879	4.98894		41.3077	4.98894
160	83	65	48	58	24	22	31	65	64	26	62	31	42								47.7692	13	19.7996	5.49143		47.7692	5.49143
180	90	77	52	62	26	28	35	73	74	30	53	34	44								52.1538	13	21.4237	5.94186		52.1538	5.94186
200	95	74	55	65	28	31	36	81	80	34	50	38	46								54.8462	13	22.1052	6.13089		54.8462	6.13089
220	100	84	58	66	29	36	38	87	86	36	46	40	47								57.9231	13	24.0259	6.66358		57.9231	6.66358
240	105	99	60	64	30	39	38	97	95	37	48	41	49								61.6923	13	27.536	7.63711		61.6923	7.63711
260	107	108	59	37	31	40	36	101	99	38	41	40	41								59.8462	13	31.1818	8.64829		59.8462	8.64829
280	111	115	59	23	31	44	17	105	107	40	31	14	24								55.4615	13	39.329	10.9079		55.4615	10.9079
300	112	115	48	22	29	44	12	113	102	62	13	14	13								53.7692	13	42.2732	11.7245		53.7692	11.7245
MUTANT																					AVERAGE	N	SD	SE
0	0	0	0	0	0	0	0	0	0	0	0	0	0	0	0	0	0	0	0	0	0	20	0	0		0	0
20	0	0	0	0	0	0	0	0	0	3	0	0	0	0	0	0	0	0	0	0	0.15	20	0.67082	0.15		0.15	0.15
40	0	0	0	0	19	0	4	0	1	14	0	0	0	6	0	0	0	0	0	3	2.35	20	5.17357	1.15684		2.35	1.15684
60	8	0	4	8	43	6	9	0	5	26	3	4	12	22	1	7	8	10	0	5	9.05	20	10.425	2.33111		9.05	2.33111
80	11	0	13	18	57	12	15	2	9	33	10	10	22	34	3	15	19	18	7	6	15.7	20	13.2192	2.9559		15.7	2.9559
100	17	0	22	27	68	17	20	7	14	43	17	16	32	46	11	23	26	25	15	8	22.7	20	15.4378	3.452		22.7	3.452
120	21	1	31	36	74	10	24	10	19	49	26	21	39	54	18	31	32	27	20	10	27.65	20	17.0364	3.80946		27.65	3.80946
140	26	6	38	42	79	8	29	13	22	47	29	25	43	62	24	39	37	30	22	11	31.6	20	17.8985	4.00224		31.6	4.00224
160	29	13	46	47	83	5	28	15	25	44	39	29	46	68	31	44	12	33	22	12	33.55	20	19.4218	4.34286		33.55	4.34286
180	33	11	50	52	83	2	17	17	26	42	39	32	47	74	38	50	8	35	17	13	34.3	20	21.4184	4.7893		34.3	4.7893
200	35	15	55	54	83	3	16	19	27	0	45	35	22	81	44	53	8	36	10	14	32.75	20	23.9294	5.35079		32.75	5.35079
220	37	14	60	54	67	2	15	20	20	0	48	39	17	81	49	56	7	38	9	15	32.4	20	23.6363	5.28523		32.4	5.28523
240	30	8	63	44	44	2	13	17	9	0	54	41	13	87	57	56	6	19	8	14	29.25	20	24.7235	5.52834		29.25	5.52834
260	20	8	64	21	32	2	10	14	7	0	62	42	13	87	59	47	5	10	7	11	26.05	20	25.2701	5.65056		26.05	5.65056
280	15	8	65	17	24	2	10	9	6	0	0	45	11	87	64	26	5	8	7	9	20.9	20	24.6766	5.51787		20.9	5.51787
300	2	2	2	2	2	2	2	2	2	0	0	0	11	72	66	21	4	4	7	6	10.45	20	20.6104	4.60862		10.45	4.60862
