# Supplementary material for: Disordered breathing in a mouse model of Dravet syndrome
Source: eLife. 2019 Apr 26;8:e43387. doi: 10.7554/eLife.43387 (PMC6506208; doi:10.7554/eLife.43387)
Supplement: Figure 5—source data 1. [file elife-43387-fig5-data1.xlsx]

## Sheet: Figure 5- Source Data 1
	RESETING													Hypopolarising step									Depolarising step
WT TONIC			SCN1A TONIC									WT -100	N=14		SCN1A-100	N=13					WT -100	N=7		SCN1A-100	N=11
X	Y		X	Y								X	Y		X	Y					X	Y		X	Y
-41.7989	-0.318062	n=24	-38.2217	0.662957	n=29							-46.4219	1.08017		-44.3303	0.610272					-38.3388	0.697715		-35.7222	0.610365
-41.6896	1.0682		-38.1827	0.389421								-46.3515	0.704424		-44.3303	0.000286387					-38.3606	-0.217291		-35.7222	-1.73599e-15
-41.7074	-0.203393		-38.1817	0.0103949								-46.3679	-0.164394		-44.1754	1.54939					-38.3039	0.566574		-35.7167	0.055297
-41.6145	1.05558		-38.2154	-0.336847								-46.2764	0.915751		-44.1848	-0.0940091					-38.3344	-0.30525		-35.7555	-0.388297
-41.7074	-0.978867		-38.1396	0.757596								-46.2459	0.304907		-44.1143	0.704309					-38.2342	1.00275		-35.6168	1.38696
-41.6044	1.00468		-38.108	0.315747								-46.1801	0.657233		-44.0909	0.234636					-38.2952	-0.609969		-35.6834	-0.665595
-41.5242	0.724853		-38.0281	0.799792								-46.098	0.821656		-43.95	1.40856					-38.16	1.35204		-35.6667	0.166498
-41.4988	0.305276		-38.0491	-0.210494								-46.098	-0.000687237		-43.9265	0.234636					-38.2211	-0.610182		-35.6889	-0.221795
-41.4276	0.839262		-37.9544	0.947196								-46.0698	0.28177		-43.9077	0.187875					-38.1208	1.00297		-35.6001	0.887999
-41.4429	-0.254338		-37.9523	0.0210941								-45.943	1.26722		-43.781	1.26745					-38.1383	-0.174429		-35.5557	0.444002
-41.4174	0.177907		-37.8586	0.936593								-45.929	0.14077		-43.7669	0.140656					-38.0772	0.610501		-35.5613	-0.0554324
-41.3322	1.00464		-37.866	-0.0735391								-45.9196	0.0939232		-43.7012	0.657577					-38.1295	-0.522648		-35.4947	0.666001
-41.3005	0.266984		-37.8618	0.0421446								-45.7576	1.6194		-43.6542	0.469616					-38.0336	0.958933		-35.5225	-0.277502
-41.2407	0.521248		-37.7608	1.01026								-45.7083	0.493097		-43.5697	0.84528					-37.9508	0.828537		-35.467	0.555001
-41.2331	0.127009		-37.786	-0.252525								-45.6684	0.399288		-43.5415	0.28177					-37.9944	-0.435966		-35.4448	0.222137
-41.1911	0.470503		-37.7502	0.357796								-45.6073	0.609871		-43.4946	0.469444					-37.8287	1.65654		-35.4281	0.166498
-41.1326	0.559414		-37.7029	0.473472								-45.5627	0.446078		-43.457	0.375693					-37.9203	-0.915326		-35.2839	1.443
-41.1123	0.127165		-37.6566	0.462862								-45.5299	0.328445		-43.3443	1.12696					-37.7808	1.395		-35.3227	-0.388297
-41.0639	0.585162		-37.5871	0.69439								-45.4641	0.657462		-43.2692	0.75107					-37.9072	-1.26461		-35.2617	0.610365
-41.0105	0.457976		-37.5377	0.49453								-45.3796	0.844621		-43.2176	0.516463					-37.7502	1.56965		-35.1951	0.665933
-40.9228	0.851987		-37.5577	-0.199979								-45.3374	0.422597		-43.1659	0.51652					-37.7938	-0.43554		-35.2395	-0.443865
-40.9342	0.0128332		-37.5072	0.504959								-45.2881	0.49281		-43.1425	0.234464					-37.6979	0.959252		-35.1618	0.777001
-40.8516	0.648437		-37.4577	0.494658								-45.2904	-0.0235667		-43.0157	1.26762					-37.6979	-0.00010636		-35.1396	0.22173
-40.788	0.788402		-37.4019	0.557756								-45.1989	0.915751		-42.9687	0.469301					-37.711	-0.130822		-35.0786	0.610027
-40.7995	-0.165319		-37.3304	0.715527								-45.1261	0.727905		-42.9218	0.469616					-37.65	0.61082		-35.0342	0.444271
-40.7104	0.813938		-37.3598	-0.294593								-45.0533	0.727962		-42.8091	1.12685					-37.6238	0.261643		-35.0897	-0.554865
-40.6876	0.406952		-37.2314	1.28398								-45.0322	0.211213		-42.7716	0.375464					-37.6456	-0.217823		-35.0064	0.832501
-40.6329	0.394115		-37.2546	-0.231482								-44.9618	0.704195		-42.7763	-0.0470189					-37.4799	1.65697		-35.0397	-0.333068
-40.624	0.190638		-37.1904	0.641895								-44.8115	1.50277		-42.5978	1.78394					-37.5061	-0.261643		-35.012	0.2775
-40.5451	0.661125		-37.1515	0.389393								-44.7857	0.258174		-42.5462	0.51652					-37.432	0.741003		-34.8955	1.1653
-40.535	0.279742		-37.1294	0.220972								-44.7317	0.540001		-42.4899	0.562966					-37.3143	1.17553		-34.9288	-0.333002
-40.4421	0.826477		-37.0273	1.02061								-44.6237	1.07989		-42.396	0.938974					-37.3492	-0.349283		-34.8511	0.777001
-40.4231	0.0889887		-36.9799	0.473594								-44.5111	1.12605		-42.3114	0.845194					-37.262	0.871612		-34.8178	0.332527
-40.3646	0.737527		-36.9189	0.610452								-44.5439	-0.328731		-42.2692	0.422912					-37.1225	1.39543		-34.8178	0.000135362
-40.3277	0.343315		-36.9	0.189337								-44.4524	0.91535		-42.1847	0.845022					-37.1442	-0.218249		-34.7789	0.388433
-40.2578	0.72495		-36.88	0.199956								-44.2763	1.76089		-42.0532	1.31418					-37.1181	0.261643		-34.6957	0.832298
-40.2145	0.254414		-36.8168	0.631379								-44.3092	-0.328788		-42.0438	0.0940663					-36.9219	1.96126		-34.6069	0.888001
-40.1637	0.661161		-36.7453	0.715602								-44.2763	0.328445		-42.0063	0.375865					-37.0396	-1.17676		-34.6014	0.0556354
-40.1268	0.394095		-36.76	-0.14742								-44.1941	0.821828		-41.8889	1.17355					-37.0396	-3.17207e-17		-34.5514	0.499568
-40.0238	0.877354		-36.6327	1.27325								-44.1026	0.914892		-41.8138	0.750927					-36.8914	1.48211		-34.5625	-0.111135
-40.0263	0.127052		-36.599	0.336716								-44.1143	-0.117748		-41.7293	0.84485					-36.874	0.174429		-34.5071	0.55473
-39.9564	0.724723		-36.5127	0.862858								-43.9524	1.62		-41.5837	1.45532					-36.9001	-0.261005		-34.4016	1.0545
-39.9043	0.317934		-36.4769	0.357902								-43.9077	0.446221		-41.5837	-5.72617e-05					-36.8347	0.653895		-34.3461	0.55473
-39.8127	1.09365		-36.4527	0.242121								-43.8866	0.211327		-42.2232	-36.0622					-36.7606	0.741322		-34.3129	0.333339
-39.6919	1.10623		-36.3906	0.62076								-43.7622	1.24402		-42.123	1.00259					-36.656	1.04625		-34.274	0.388433
-39.7085	-0.0382223		-36.2907	0.999733								-43.7387	0.234808		-41.9529	1.69978					-36.6865	-0.305516		-34.2185	0.555001
-39.6118	0.788468		-36.2801	0.105201								-44.5557	-39.3717		-41.8963	0.566867					-36.6124	0.740684		-34.1908	0.2775
-39.5495	0.750172		-36.2023	0.778818								-44.4445	1.11153		-41.8047	0.915645					-36.547	0.654321		-34.1297	0.61023
-39.519	0.3052		-36.1612	0.410609								-44.414	0.30525		-41.7524	0.52326					-36.5034	0.436072		-34.041	0.887527
-39.5114	0.0509546		-36.116	0.452385								-44.2483	1.65617		-41.6696	0.828217					-36.4423	0.610607		-34.0299	0.110865
-39.4007	1.1318		-36.0718	0.441949								-44.233	0.152732		-41.5737	0.958773					-36.4729	-0.304984		-34.041	-0.110934
-39.3422	0.45792		-35.9928	0.789171								-44.1023	1.30779		-41.5126	0.610421					-36.377	0.959355		-33.9799	0.610501
-39.2672	0.851989		-35.9497	0.431391								-43.9627	1.39575		-41.3775	1.35188					-36.281	0.95968		-33.93	0.499027
-39.1502	1.11906		-35.8739	0.757818								-43.9083	0.54509		-41.3034	0.741296					-36.1764	1.04657		-33.8301	0.998864
-39.1579	0.000147435		-35.8118	0.620853								-43.8036	1.04615		-41.2467	0.566468					-36.0543	1.22058		-33.7968	0.332933
-39.1006	0.470676		-35.7192	0.926139								-43.6053	1.98386		-41.1464	1.00233					-35.9148	1.39543		-33.7857	0.111135
-38.99	1.23368		-35.6593	0.599875								-43.651	-0.457822		-41.0069	1.39492					-35.8712	0.435753		-33.7025	0.832501
-38.9328	0.495966		-35.5614	0.978871								-43.5093	1.41689		-40.9502	0.567					-35.8146	0.566787		-33.5693	1.33132
-38.8387	0.966424		-35.4909	0.705118								-43.4396	0.697715		-40.802	1.48209					-35.7274	0.872144		-33.536	0.333474
-38.8323	0.0890934		-35.3941	0.967979								-43.2914	1.48206		-40.7148	0.871878					-35.6925	0.348219		-33.4251	1.10953
-38.6823	1.44962		-35.3215	0.726099								-43.2151	0.7627		-40.6407	0.740631					-35.6402	0.522754		-33.3307	0.942687
-38.62	0.648647		-35.2425	0.789099								-43.1322	0.827739		-40.5491	0.915698					-35.6097	0.304825		-33.3196	0.111
-38.5857	0.343293		-35.1836	0.589169								-42.9622	1.69983		-40.4183	1.30827					-35.4745	1.3514		-33.2586	0.609961
-38.4928	0.90283		-35.0163	1.67323								-42.9382	0.23984		-40.2963	1.22071					-35.4135	0.610501		-33.1088	1.49816
-38.3975	0.953746		-34.9774	0.389435								-42.7333	2.04885		-40.1437	1.52567					-35.2565	1.56954		-32.9923	1.1655
-38.2868	1.10636		-34.9005	0.768237								-42.681	0.522754		-40.0521	0.915166					-35.2129	0.436072		-32.9978	-0.0550939
-38.2258	0.584852		-34.8069	0.936607								-42.5197	1.61192		-39.9475	1.0462					-35.1301	0.828005		-32.8536	1.443
-38.1432	0.877383		-34.7111	0.957594								-42.426	0.936996		-39.8036	1.43893					-35.0996	0.305038		-32.7814	0.721365
-38.0096	1.25887		-34.5722	1.38911								-42.2821	1.43904		-39.6728	1.30798					-34.9862	1.13379		-32.7037	0.776322
-37.8965	1.18258		-34.5164	0.557562								-42.1535	1.2862		-39.5682	1.04593					-34.838	1.48275		-32.6372	0.665865
-37.8265	0.699405		-34.4291	0.873407								-42.0728	0.806627		-39.5028	0.653576					-34.6898	1.48158		-32.5206	1.1651
-37.707	1.16983		-34.2902	1.38907								-41.9486	1.24201		-39.2979	2.04914					-34.5633	1.26344		-32.4097	1.11
-37.5862	1.25882		-34.1397	1.50493								-41.8222	1.26402		-39.1889	1.09002					-34.4151	1.48169		-32.2432	1.66378
-37.4171	1.58942		-34.0271	1.12605								-41.6826	1.39543		-39.0625	1.26429					-34.4107	0.0436072		-32.1489	0.943433
-37.3332	0.966527		-33.9198	1.07337								-41.5519	1.30795		-38.8968	1.65686					-34.1797	2.31033		-32.0878	0.610771
-37.1895	1.33529		-33.7472	1.726								-41.408	1.43888		-38.7399	1.56927					-34.0533	1.26381		-31.8881	1.99773
-37.0801	1.16996		-33.5735	1.7364								-41.2903	1.17702		-38.6527	0.871878					-34.0009	0.522967		-31.7716	1.1655
-36.9364	1.43693		-33.4757	0.978579								-41.0745	2.15848		-38.487	1.6567					-33.8614	1.39479		-31.6329	1.38601
-36.8017	1.32257		-33.2357	2.39936								-40.9132	1.61347		-38.3126	1.74349					-33.6304	2.31118		-31.3832	2.49676
-36.6758	1.20821		-33.0453	1.90453								-40.8129	1.00243		-38.1513	1.61283					-33.4211	2.09283		-31.2334	1.49843
-36.4927	1.88192		-32.8001	2.45201								-40.5993	2.13617		-38.0511	1.00233					-33.2642	1.56986		-31.0225	2.10914
-36.3502	1.37315		-32.5717	2.28339								-40.3857	2.13574		-37.8331	2.17967					-33.0941	1.70015		-30.7895	2.331
-36.1621	1.83088		-32.2455	3.26216								-40.1502	2.35484		-37.6369	1.96195					-32.8369	2.57197		-30.4565	3.32845
-35.9243	2.42861		-31.9067	3.38868								-39.8908	2.59463		-37.493	1.43877					-32.4969	3.40136		-30.0681	3.88399
-35.6776	2.46667		-31.4447	4.61938								-39.4614	4.29446		-37.2925	2.00588					-32.305	1.91818		-29.5854	4.82675
-35.422	2.63216		-30.888	5.56754								-38.8423	6.19174		-37.0701	2.22269					-31.9606	3.44364		-28.8419	7.43599
-35.1067	3.02646		-30.1577	7.30309								-38.075	7.66683		-36.7693	3.00799					-31.5944	3.66024		-27.8542	9.87901
-34.7697	3.36941		-29.2253	9.32319								-36.9154	11.599		-36.4903	2.79059					-31.1672	4.27169		-26.4671	13.8684
-34.3437	4.13275		-27.9478	12.7749								-35.4549	14.6084		-35.9977	4.92665					-30.5873	5.79976		-24.7359	17.3123
-33.7448	5.98937		-26.2714	16.7623								-33.9617	14.9334		-35.4614	5.36161					-29.711	8.76387		-22.3389	23.9683
-32.7962	9.43498		-23.9763	22.9534								-32.5492	14.1281		-34.6985	7.62881					-28.1895	15.216		-19.4036	29.3532
-31.2513	14.8649		-20.9971	29.7922								-31.3503	11.9839		-33.1682	15.303					-25.9399	22.4895		-15.8969	35.076
-28.5734	25.6842		-17.2319	37.6512								-30.1426	12.0768		-30.7007	24.6793					-22.3127	36.2674		-11.6078	42.8844
-24.2399	42.0119		-12.3744	48.5759								-28.4489	16.9414		-26.6593	40.4144					-17.4212	48.9273		-6.78045	48.2695
-17.7002	63.8199		-6.28452	60.8931								-25.2686	31.7969		-20.4468	62.1242					-10.9471	64.7466		-1.24845	55.3206
-8.53602	90.4514		0.876591	71.6166								-19.5182	57.5064		-11.6185	88.2784					-2.82942	81.1806		4.54989	57.9786
2.95385	114.849		8.70277	78.2636								-10.0185	94.9882		-0.2485	113.692					6.12967	89.5625		10.4315	58.8301
15.1965	123.515		16.5079	78.0487								3.16729	131.85		12.6866	129.367					15.0016	88.715		15.9135	54.814
26.3964	113.597		23.3039	67.9607								17.589	144.253		25.0549	123.673					22.3519	73.5217		20.6687	47.5446
34.9045	86.7107		28.4855	51.8145								29.9639	123.738		34.7595	97.0611					27.8015	54.5023		24.0922	34.2395
39.8369	51.0304		31.6341	31.488								37.6195	76.5601		40.5535	57.9291					31.0059	32.0452		26.0676	19.7529
41.0461	13.3381		32.6843	10.5015								39.6685	20.4877		42.1927	16.3911					32.2702	12.6376		26.8666	7.99201
38.8349	-20.7628		31.693	-9.91245								36.5383	-31.2959		39.8821	-23.1105					31.7296	-5.40527		26.2285	-6.38129
33.7893	-49.7426		29.1464	-25.4667								29.5476	-69.9241		34.7421	-51.3948					29.8026	-19.2744		24.4751	-17.5298
27.0004	-67.279		25.2643	-38.8176								20.4424	-91.0487		27.7012	-70.4192					26.7421	-30.6091		21.8173	-26.5813
19.1778	-78.0539		20.6109	-46.5377								10.5416	-99.0139		19.6664	-80.3338					22.8969	-38.4514		18.3605	-34.5672
11.1847	-79.9314		15.4482	-51.6265								0.930786	-96.0905		11.5138	-81.5203					18.3847	-45.1097		14.4598	-39.0165
3.39635	-78.0581		10.1434	-53.0476								-7.87353	-88.0395		3.66211	-78.5293					13.5978	-47.8647		10.4537	-40.0556
-3.87955	-73.062		4.95858	-51.8494								-15.673	-78.0132		-3.56184	-72.2345					8.55364	-50.4535		6.27552	-41.7747
-10.4345	-65.8292		-0.0357792	-49.9402								-22.3301	-66.5667		-10.1188	-65.5765					3.35257	-52.0171		2.16952	-41.0635
-16.4388	-60.3261		-4.7197	-46.8423								-27.9694	-56.3946		-15.8866	-57.6733					-1.73078	-50.8337		-1.73118	-39.006
-21.609	-52.2116		-9.06056	-43.4085								-32.7933	-48.2306		-20.8566	-49.6953					-6.5264	-47.9424		-5.42103	-36.9075
-26.3227	-47.3135		-13.0594	-39.9876								-36.8413	-40.4797		-25.3732	-45.1718					-11.0779	-45.5101		-8.92778	-35.0626
-30.337	-40.6248		-16.6679	-36.0852								-40.281	-34.4061		-29.2097	-38.3638					-15.3024	-42.2554		-12.2292	-33.0105
-33.9241	-36.0239		-19.9364	-32.6835								-43.0647	-27.8318		-32.5841	-33.7447					-19.2435	-39.4149		-15.2033	-29.7416
-37.0153	-31.3199		-22.8977	-29.6147								-45.4363	-23.7183		-35.4178	-28.3378					-22.8097	-35.6643		-17.9998	-27.964
-39.6805	-26.9065		-25.5916	-26.94								-47.4178	-19.8114		-37.9813	-25.6327					-26.0794	-32.6872		-20.4856	-24.864
-41.9922	-23.1677		-27.9951	-24.0344								-48.9981	-15.8052		-40.1175	-21.3642					-29.0789	-29.9914		-22.8438	-23.5785
-44.0178	-20.5092		-30.1251	-21.2994								-50.2624	-12.6461		-41.9137	-17.9625					-31.6075	-25.2922		-24.9079	-20.6396
-45.7357	-17.2557		-32.0329	-19.0775								-51.372	-11.0913		-43.4527	-15.3881					-33.8745	-22.672		-26.8499	-19.4195
-47.0924	-13.7968		-33.7661	-17.3334								-52.1349	-7.63035		-44.8347	-13.8202					-36.0238	-21.4954		-28.5922	-17.422
-48.3678	-12.6522		-35.2699	-15.0382								-52.791	-6.56102		-45.9072	-10.7244					-37.8854	-18.609		-30.1514	-15.5955
-49.4334	-10.7319		-36.6758	-14.0585								-53.2989	-5.07915		-46.8314	-9.24345					-39.5159	-16.3036		-31.6051	-14.5355
-50.2815	-8.76079		-37.9039	-12.2808								-53.7458	-4.46974		-47.6379	-8.06629					-40.9241	-14.0851		-32.8647	-12.5956
-51.0966	-7.94766		-39.0772	-11.7325								-53.9878	-2.41797		-48.2047	-5.66643					-42.1622	-12.3825		-34.0798	-12.1504
-51.6968	-6.17978		-40.0548	-9.77714								-54.16	-1.72248		-48.7889	-5.84166					-43.1693	-10.0735		-35.1951	-11.1527
-52.2613	-5.59478		-40.9293	-8.74538								-54.2711	-1.11172		-49.1464	-3.5752					-44.2418	-10.721		-36.0884	-8.93551
-52.6835	-4.34856		-41.7459	-8.16566								-54.3823	-1.11196		-49.4428	-2.96492					-44.9916	-7.49788		-37.0095	-9.20895
-53.0167	-3.25512		-42.4584	-7.12408								-54.3649	0.174429		-49.687	-2.44214					-45.7633	-7.71847		-37.8418	-8.32311
-53.3498	-3.30636		-43.115	-6.56602								-54.3867	-0.217185		-49.8134	-1.26354					-46.3388	-5.75455		-38.5021	-6.60193
-53.5889	-2.61946		-43.7201	-6.05172								-54.2733	1.13336		-49.9791	-1.65659					-47.0755	-7.36828		-39.2068	-7.04702
-53.8139	-2.12359		-44.2526	-5.32509								-54.2363	0.369917		-50.0663	-0.87225					-47.372	-2.96167		-39.7505	-5.43901
-54.0187	-2.02151		-44.7209	-4.68259								-54.1425	0.937156		-50.1055	-0.392252					-47.93	-5.58002		-40.3775	-6.26805
-54.17	-1.56393		-45.1586	-4.37751								-51.4738	0.806733		-50.1665	-0.610873					-48.2265	-2.96529		-40.8603	-4.82769
-54.3238	-1.5643		-45.5712	-4.12469								-51.333	1.04641		-50.1273	0.39289					-48.584	-3.57515		-41.3042	-4.43838
-54.3493	-0.279529		-45.9374	-3.66265								-51.1551	1.72238		-50.1142	0.130981					-48.7061	-1.22153		-41.7647	-4.60556
-54.437	-0.826374		-46.2552	-3.17825								-51.0667	0.522276		-50.0663	0.479387					-48.9502	-2.44051		-42.081	-3.1635
-54.5158	-0.864428		-46.554	-2.98847								-50.8648	1.78672		-50.0619	0.0438199					-49.0766	-1.2644		-42.4916	-4.10484
-54.5832	-0.521415		-46.8087	-2.54664								-50.7044	1.54806		-49.9573	1.04593					-49.312	-2.35479		-42.8356	-3.4406
-54.615	-0.470598		-47.0539	-2.45148								-50.5201	1.56991		-49.8352	1.22121					-49.469	-1.56922		-43.0797	-2.44105
-54.6595	-0.343239		-47.2928	-2.38904								-50.3814	1.24259		-49.8352	0.000212725					-49.5605	-0.916017		-43.3738	-2.94157
-54.6392	0.101671		-47.478	-1.85219								-50.2363	1.43797		-49.6477	1.8746					-49.6216	-0.609969		-43.6512	-2.775
-54.6824	-0.305056		-47.6632	-1.85203								-50.0563	1.56906		-49.5257	1.22074					-49.7349	-1.13336		-43.9009	-2.49595
-54.6773	-0.0507994		-47.8716	-2.08373								-49.9438	0.85034		-49.4472	0.784318					-49.8352	-1.00297		-44.0452	-1.44327
-54.6519	0.330546		-47.9999	-1.28368								-49.7071	2.35458		-49.3644	0.828483					-49.905	-0.697183		-44.2616	-2.16376
-54.7028	-0.584928		-48.1115	-1.11561								-49.5794	1.22068		-49.1943	1.70015					-49.905	-0.00106363		-44.4447	-1.8313
-54.7028	0.12723		-48.262	-1.50496								-49.4561	1.00206		-49.1289	0.653922					-49.9442	-0.392039		-44.6167	-1.7205
-54.6379	0.44501		-48.3946	-1.32579								-49.3109	1.30726		-48.9851	1.43877					-49.9093	0.348751		-44.7388	-1.21992
-54.6799	-0.241752		-48.5208	-1.26268								-49.1614	1.52625		-48.863	1.22034					-50.1011	-1.91872		-44.8997	-1.60896
-54.6519	0.127065		-48.5924	-0.715242								-49.025	1.09002		-48.693	1.70068					-50.0619	0.392571		-45.0217	-1.22046
-54.6214	0.407071		-48.7397	-1.47328								-48.8101	2.04954		-48.6843	0.0878525					-50.1317	-0.697715		-45.1327	-1.10987
-54.6099	0.0889227		-48.8081	-0.684066								-48.7674	0.283021		-49.6591	1.73715					-50.0227	1.09029		-45.2992	-1.665
-54.6443	-0.368815		-48.9113	-1.03139								-48.6266	1.35161		-49.5558	1.03327					-50.0881	-0.654001		-45.4268	-1.27535
-54.5832	0.584912		-48.9807	-0.694727								-48.4444	1.76609		-49.5042	0.516406					-50.1055	-0.174429		-45.4934	-0.66573
-54.5832	0.0254996		-49.087	-1.0626								-48.3516	0.915272		-49.4244	0.798118					-50.1186	-0.131247		-45.6265	-1.3318
-54.5858	-0.0506849		-49.1417	-0.547426								-48.1977	1.3079		-49.2976	1.26722					-50.136	-0.174961		-45.7431	-1.16564
-54.5527	0.381483		-49.2501	-1.08421								-48.1027	0.805935		-49.1943	1.03261					-50.0968	0.392252		-45.8485	-1.0545
-54.5387	0.139764		-49.2564	-0.0631938								-47.927	1.52567		-49.1145	0.798175					-50.1099	-0.130715		-45.9539	-1.05349
-54.5387	-0.0508654		-49.3827	-1.26272								-47.8822	0.174429		-49.0629	0.516291					-50.1622	-0.523286		-46.0094	-0.555001
-54.5451	0.0126509		-49.4185	-0.357681								-47.7501	1.26413		-48.9643	0.985678					-50.1927	-0.305144		-46.1148	-1.05464
-54.5438	-0.012613		-49.5111	-0.926113								-47.6071	1.37331		-48.8	1.6432					-50.0619	1.30715		-46.1759	-0.610839
-54.5909	-0.445172		-49.5237	-0.126294								-47.5121	0.849542		-48.7671	0.328702					-50.0793	-0.17528		-46.248	-0.721501
-54.5311	0.546708		-49.55	-0.263018								-47.4062	0.828271		-48.6638	1.03304					-50.1273	-0.479892		-46.3312	-0.831959
-54.5133	0.178022		-49.6637	-1.1365								-47.3504	0.370661		-48.5652	0.985993					-50.0663	0.610501		-46.3867	-0.554865
-54.5235	-0.101823		-49.6679	-0.0420939								-47.19	1.46047		-48.4854	0.798232					-50.1142	-0.479892		-46.4588	-0.721433
-54.526	-0.050923		-49.7279	-0.600004								-47.1016	0.653629		-48.4666	0.187846					-50.1142	8.51495e-09		-46.5254	-0.665933
-54.5235	0.127339		-49.7458	-0.178914								-46.976	1.24238		-48.3211	1.45564					-49.9747	1.39543		-46.5365	-0.111
-54.5489	-0.330508		-49.8089	-0.631353								-46.8309	1.35156		-48.2225	0.985907					-50.1622	-1.87479		-46.5976	-0.609756
-54.5235	0.33068		-49.8352	-0.263051								-46.7904	0.218036		-48.1426	0.798261					-50.1099	0.523286		-46.642	-0.443662
-54.5565	-0.406882		-49.8752	-0.399823								-46.6845	0.958826		-48.1004	0.422654					-49.9704	1.39522		-46.7862	-1.44239
-54.5247	0.241744		-49.8931	-0.178911								-46.6112	0.50127		-47.9783	1.22066					-50.1186	-1.48158		-46.764	0.221865
-54.5336	0.0890546		-49.9752	-0.820774								-46.4857	1.02424		-47.9173	0.610415					-50.0227	0.958933		-46.8528	-0.888001
-54.5031	0.254212		-49.9857	-0.105272								-46.3406	1.26424		-47.8422	0.751156					-49.966	0.566893		-46.8805	-0.277162
-54.4802	0.177985		-50.0509	-0.65236								-46.2979	0.370661		-47.7858	0.563138					-50.0706	-1.04657		-46.9416	-0.610568
-54.5209	-0.457726		-50.0551	-0.0420906								-46.2116	0.762541		-47.6497	1.36149					-50.0619	0.0874271		-46.9749	-0.332933
-54.4904	0.407056		-50.1541	-0.989342								-46.0686	1.06816		-47.5792	0.703794					-50.0706	-0.0866826		-46.9971	-0.222
-54.4408	0.572203		-50.1246	0.294567								-45.9867	0.631666		-47.5182	0.610443					-50.0488	0.218568		-47.0803	-0.832501
-54.4383	-0.203424		-50.1751	-0.505107								-45.968	0.174269		-47.4149	1.03321					-50.1011	-0.523924		-47.0914	-0.110865
-54.4879	-0.343271		-50.1814	-0.0629787								-45.8533	0.872144		-47.429	-0.140742					-49.9834	1.17739		-47.158	-0.665865
-54.5349	-0.394169		-50.2088	-0.273403								-45.7932	0.414215		-47.2882	1.40856					-50.0575	-0.741535		-47.1691	-0.111135
-54.4777	0.394334		-50.2319	-0.231499								-45.7265	0.479679		-47.1661	1.22071					-50.027	0.304453		-47.2301	-0.610433
-54.4675	0.127176		-50.2456	-0.136775								-45.6054	1.15463		-47.1473	0.187846					-50.1142	-0.871825		-47.2246	0.0555001
-54.5158	-0.330593		-50.3066	-0.610257								-45.4668	1.32935		-47.0252	1.22066					-50.0706	0.436285		-47.3189	-0.942689
-54.4179	0.801111		-50.3182	-0.115586								-45.3957	0.30525		-46.9454	0.798032					-50.1317	-0.610501		-47.391	-0.721365
-54.4713	-0.508463		-50.3487	-0.305106								-45.353	0.326894		-47.0018	-0.563482					-50.0227	1.09007		-47.3744	0.166026
-54.4256	0.610445		-50.3698	-0.21055								-45.2297	1.22074		-46.9126	0.891984					-50.1447	-1.21994		-47.4465	-0.721298
-54.4446	-0.368747		-50.3351	0.347257								-45.421	0.469501		-46.7905	1.22097					-50.0968	0.479466		-47.4632	-0.1665
-54.4395	0.178107		-50.3719	-0.368296								-45.4126	-0.164451		-46.7717	0.187732					-50.1535	-0.567106		-47.4521	0.111203
-54.3989	0.305146		-50.4161	-0.441804								-45.3572	0.493097		-46.7529	0.187875					-50.0706	0.828537		-47.4853	-0.332865
-54.4306	-0.190847		-50.4108	0.0525266								-45.2619	0.704596		-46.659	0.938945					-50.1404	-0.697502		-47.5353	-0.499094
-54.4243	-0.0126014		-50.4603	-0.494755								-45.2042	0.328903		-46.6074	0.516749					-50.1229	0.173897		-47.5741	-0.388094
-54.4586	-0.419578		-50.4571	0.031584								-45.1512	0.469616		-46.6027	0.0472767					-50.2537	-1.30736		-47.5075	0.666001
-54.4497	0.266933		-50.5034	-0.463055								-45.0982	0.32833		-46.5276	0.751156					-50.1099	1.43872		-47.6185	-1.1096
-54.3493	0.800974		-50.455	0.483933								-45.0616	0.117404		-46.4947	0.328502					-50.1055	0.0436072		-47.613	0.055297
-54.4217	-0.597638		-50.5045	-0.494616								-45.0555	4.9533e-16		-46.4618	0.328387					-50.0357	0.697715		-47.6296	-0.166636
-54.3899	0.216264		-50.5192	-0.147558								-44.9156	1.15039		-46.382	0.798232					-50.2014	-1.65601		-47.6796	-0.499365
-54.4586	-0.457757		-50.4708	0.483991								-44.9471	-0.610157		-46.3445	0.375549					-50.1622	0.391933		-47.613	0.666001
-54.3976	0.356017		-50.5224	-0.515691								-44.88	0.704252		-46.3022	0.422769					-50.0706	0.915325		-47.7017	-0.887324
-54.3887	0.216004		-50.6139	-0.915439								-44.8387	-0.0234808		-46.2459	0.56331					-50.1447	-0.741322		-47.7239	-0.221933
-54.3861	0.126945		-50.576	0.378838								-44.7646	0.587134		-46.1942	0.516291					-50.136	0.087108		-47.7128	0.110729
-54.4027	-0.343389		-50.615	-0.389435								-44.6787	0.892041		-46.2036	-0.0944959					-50.0139	1.21994		-47.7683	-0.554865
