# Supplementary material for: Disordered breathing in a mouse model of Dravet syndrome
Source: eLife. 2019 Apr 26;8:e43387. doi: 10.7554/eLife.43387 (PMC6506208; doi:10.7554/eLife.43387)
Supplement: Figure 6—source data 1. [file elife-43387-fig6-data1.xlsx]

## Sheet: Figure 6- Source Data
RTN CO2 induced firing response
			3	5	7	10	%CO2
	Average	WT	1.02283	1.51254	2.21588	3.15325
		MUTANT	1.97122	2.85368	3.73661	4.82384
	SE	WT	0.364498	0.484731	0.510255	0.456897
		MUTANT	0.54877	0.668313	0.95616	0.639713
			F = 8.04. DFn = 1, DFd = 4
			P=0.0471
WT
											AVERAGE	N	SD	SE
3	2.71994	0.399705	1.74678	1.79431	0.119542	1.4024	0	0			1.02283	8	1.03096	0.364498		1.02283	0.364498
5	3.87667	0.408544	2.75405	1.9969	0.47898	2.05409	0.038954	0.492147			1.51254	8	1.37103	0.484731		1.51254	0.484731
7	4.61689	0.597604	3.24585	3.18106	0.637247	2.71216	1.48694	1.24927			2.21588	8	1.44322	0.510255		2.21588	0.510255
10	4.8875	1.12349	3.6992	4.04308	1.36998	3.46997	3.05251	3.58029			3.15325	8	1.2923	0.456897		3.15325	0.456897
%CO2
MUTANT
											AVERAGE	N	SD	SE
3	3.09866	0.738394	0.014987	2.71835	0	3.92656	3.3761	1.89672	0.628177	1.83212	1.97122	8	1.55216	0.54877		1.97122	0.54877
5	3.82147	2.13549	0.126705	2.65211	1.26605	6.35815	3.9384	2.53105	1.11957	0.561842	2.85368	8	1.89028	0.668313		2.85368	0.668313
7	4.54368	3.40797	0.687585	3.40898	1.08061	9.4153	4.603	2.74573	1.72749	2.12319	3.73661	8	2.70443	0.95616		3.73661	0.95616
10	4.69241	5.37522	2.99868	4.33602	3.61117	8.87811	4.92792	3.77122	2.27714	2.8973	4.82384	8	1.80938	0.639713		4.82384	0.639713
%CO2
