# Supplementary material for: Disordered breathing in a mouse model of Dravet syndrome
Source: eLife journal article supplement (doi:10.7554/elife.43387), 2019-04-26
Supplement: supp [file elife_poa_e43387_Figure_1_figure_supplement_1.pdf › elife_poa_e43387_Figure_1_figure_supplement_1.pdf]

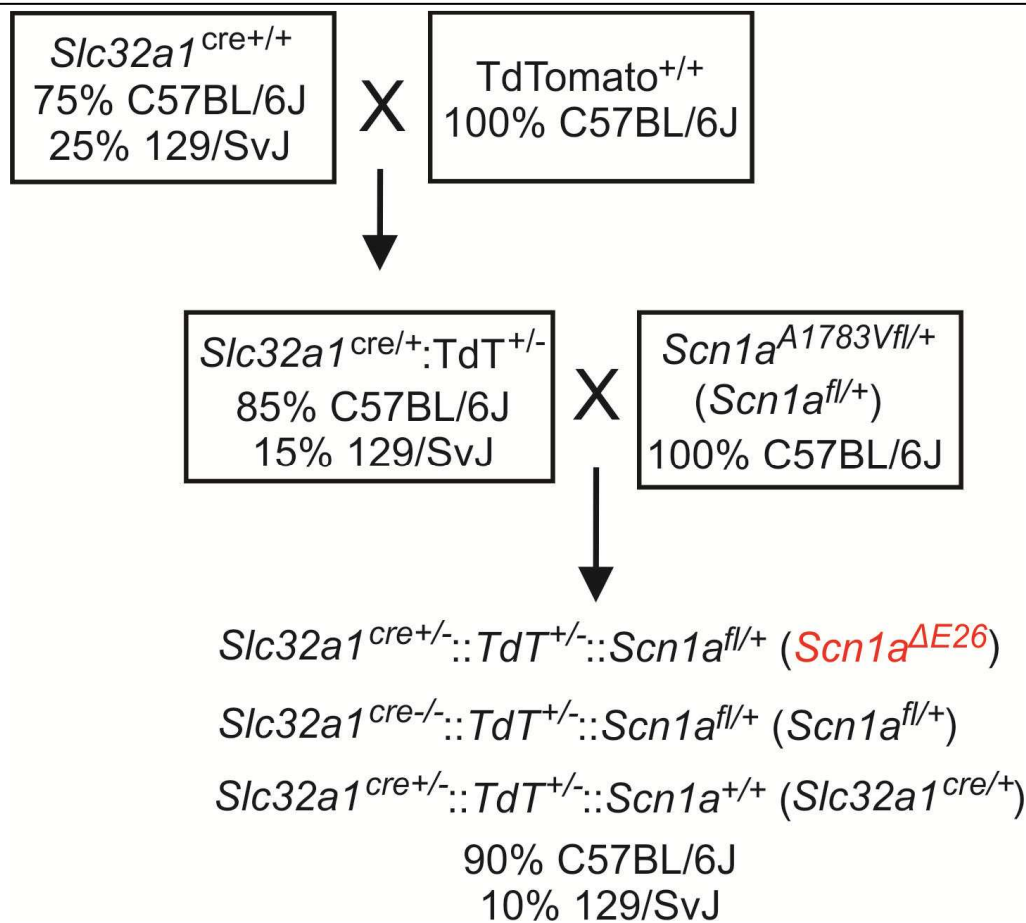

**Figure 1 supplement 1. Breeding strategy to generate mice that heterologously express the *Scn1a* A1783V pathological variant conditionally in inhibitory neurons (*Scn1a*<sup>ΔE26</sup> mice).** Homozygous Gt(ROSA)26Sor<sup>tm14(CAG-tdTomato)Hze/J</sup> reporter mice (Ai14; JAX no. 007914) on a 100% C57BL/6J background are bred with mice that express Cre recombinase targeted to *Slc32a1*, the gene encoding Vgat (*Slc32a1*<sup>Cre</sup> mice, JAX no. 016962), on a mixed background of 75%::25% C57BL/6J::129/SvJ to produce *Slc32a1*<sup>Cre</sup>::*TdT* double-heterozygous mice with a 85% C57BL/6J :: 15% 129/SvJ background. These mice are then bred with *Scn1a*<sup>A1783Vfl/+</sup> (JAX no. 026133) maintained on a 100% C57BL/6J background to produce experimental animals with a genotype of *Slc32a1*<sup>cre+/-::TdT+/-::Scn1a<sup>fl/+</sup></sup> (*Scn1a*<sup>ΔE26</sup>) and control animals of the following genotypes *Slc32a1*<sup>cre-/-::TdT+/-::Scn1a<sup>fl/+</sup></sup> (*Scn1a*<sup>fl/+</sup>) and *Slc32a1*<sup>cre+/-::TdT+/-::Scn1a<sup>+/+</sup></sup> (*Slc32a1*<sup>cre/+</sup>). Experimental and control mice had a common background of 90% C57BL/6J :: 10% 129/SvJ. The proportion of each background strain was determined by Genome scan analysis (JAX).
