# Supplementary material for: Disordered breathing in a mouse model of Dravet syndrome
Source: eLife. 2019 Apr 26;8:e43387. doi: 10.7554/eLife.43387 (PMC6506208; doi:10.7554/eLife.43387)
Supplement: Table 2—source data 1. [file elife-43387-table2-data1.xlsx]

## Sheet: Sheet1
Table 2
Control Mice	Tail #	Weight (g)	Seizure?	Temperature			Scn1a EXP	Tail #	Weight	Seizure?	Temperature
2019-01-25	1	no record	0	42.5 C			2019-01-25	3	5.5	1	41.5
	2	'	0	42.5 C				7	5	1	41
	4	'	0	42.5 C			2019-01-31	2	7.21	1	41.5
	5	'	0	42.5 C				3	7.15	1	41.5
2019-01-31	1	7.31	0	42.5 C				4	6.92	1	41.8
	5	5.78	0	42.5 C			2019-02-27	1	6.31	1	41
	6	6.28	0	42.5 C				2	7.85	1	40.5
2019-02-27	4	6.62	0	42.5 C				3	7.12	1	40
	5	7.64	0	42.5 C				7	7.3	1	41
	6	6.29	0	42.5 C
										AVG TEMP	41.0889
			AVG TEMP	42.5
			Fisher's exact test (two-sided)
0= no			Control	Scn1a
1= yes		0 (no seizure)	10	0
		1 (tonic-clonic)	0	9
			p < 0.0001
